# Supplementary material for: Gut Dysbiosis in a Murine Model of Cutaneous Lupus Erythematosus Correlates with Infiltration of Antigen-Specific T cells and Antigen Presenting Cells in Skin
Source: Research Square preprint supplement (doi:10.21203/rs.3.rs-7023225/v1), 2025-08-19
Supplement: Supplementary file 1 [file ec5359a862aeeb3435d8affa.docx]

**Gut Dysbiosis in a Murine Model of Cutaneous Lupus Erythematosus Correlates with Infiltration of Antigen-Specific T cells and Antigen Presenting Cells in Skin**

Haley Neff1, Ümmügülsüm Yıldız-Altay1, Nuha Salam1, Doyle V. Ward2, Dominique Shepard3, Zaida G Ramirez-Ortiz3, Jillian M Richmond1,4*

**Supplemental Figures & Legends**:


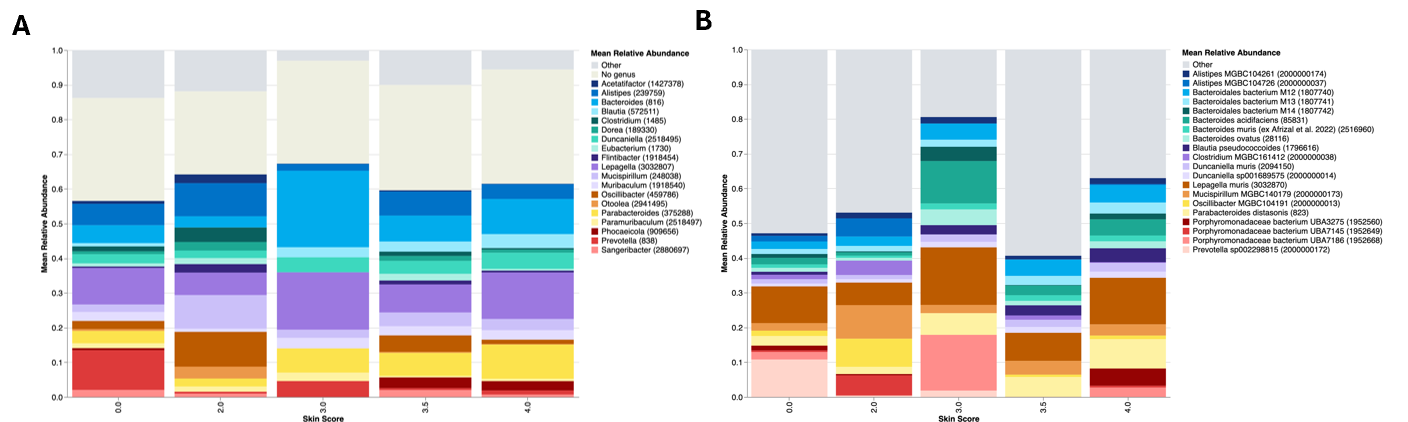


**Figure S1. Relative abundance plots by skin score. A.** Relative abundance plot of top 20 genera and **B.** top 10 species binned by skin score (n= 19 score 0, n = 1 score 2, n = 1 score 3.0, n = 2 score 3.5, and n = 5 score 4 mice).


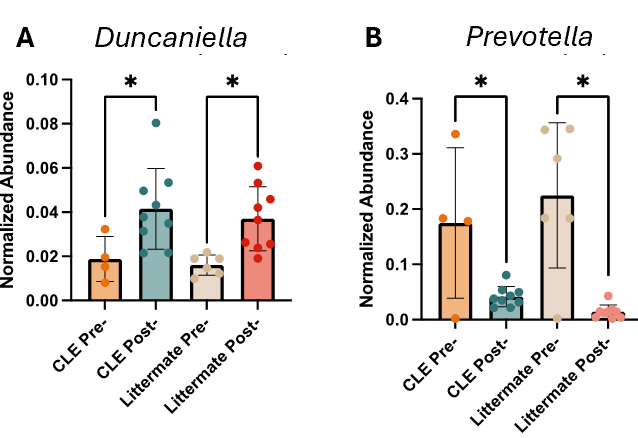


**Figure S2. Relative abundance of some genera increased after irradiation, while others decreased. A**. Abundance of genus *Duncaniella* pre- and post-irradiation by experimental group. **B.** Abundance of genus *Prevotella* pre- and post-irradiation by experimental group. * indicates p < 0.05.


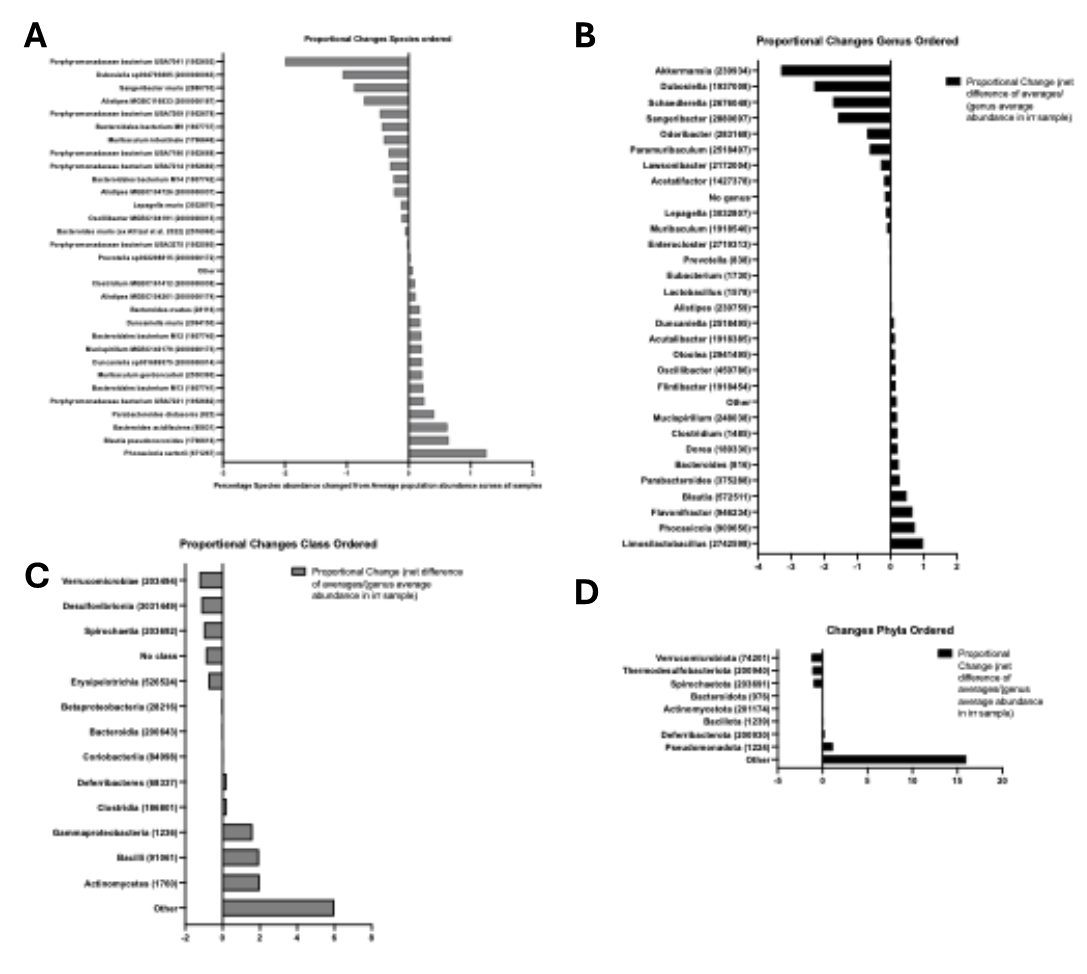


**Figures S3. Proportional changes in abundance of specific taxa** (**A.** species, **B.** genus, **C.** class, **D.** phyla) in irradiated CLE compared to irradiated littermate mice.
